# Supplementary material for: Polycatenated 3-connected hydrogen-bonding bilayer stabilized by argentophilic interactions
Source: Royal Society of Chemistry journal article supplement (doi:10.1039/b702972a), 2007-01-01
Supplement: b702972a.pdf [file b702972a.pdf]

Supporting Information

**Polycatenated 3-connected hydrogen-bonding bilayer stabilized by argentophilic interactions**

Jian Zhang <sup>a</sup>, Yi-Cheng Shen <sup>a</sup>, Ye-Yan Qin <sup>a</sup>, Zhao-Ji Li <sup>a, b</sup> and Yuan-Gen Yao <sup>a, b\*</sup>

<sup>a</sup> State Key Laboratory of Structural Chemistry, Fujian Institute of Research on the Structure of Matter, The Chinese Academy of Sciences, Fuzhou, Fujian 350002, CHINA; E-mail:

[yyg@fjirsm.ac.cn](mailto:yyg@fjirsm.ac.cn)

<sup>b</sup> State Key Laboratory of Coordination Chemistry, Institute of Coordination Chemistry, Nanjing University, Nanjing, 210093, China

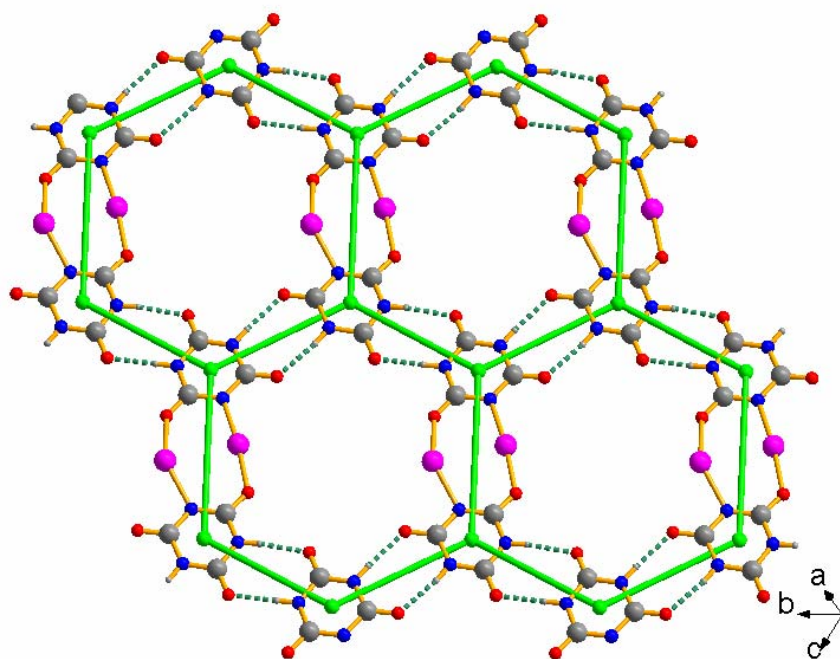

**Figure S1.** The honeycomb layer in 1.

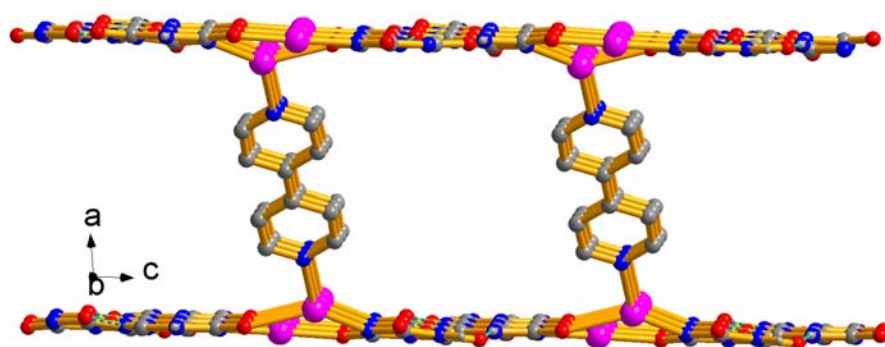

**Figure S2.** View of the bilayer in 1 along *b* axis.

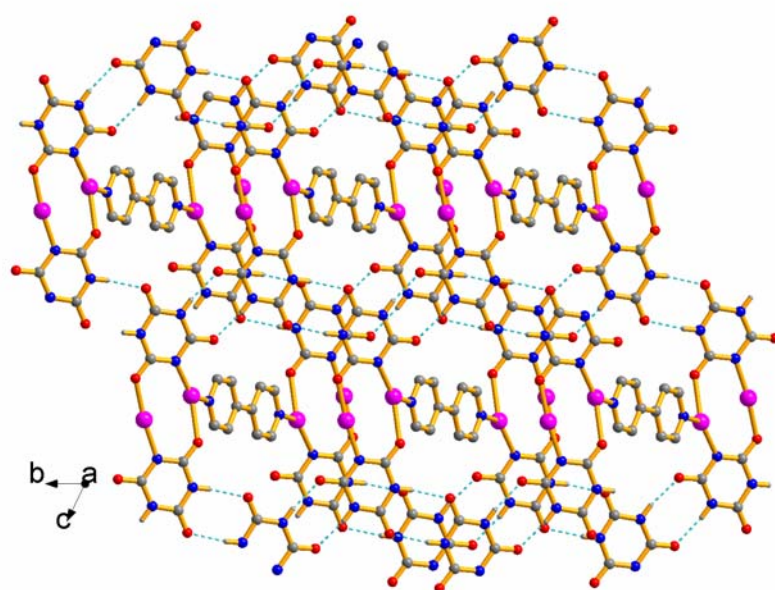

**Figure S3.** View of the bilayer in 1 along *a* axis.

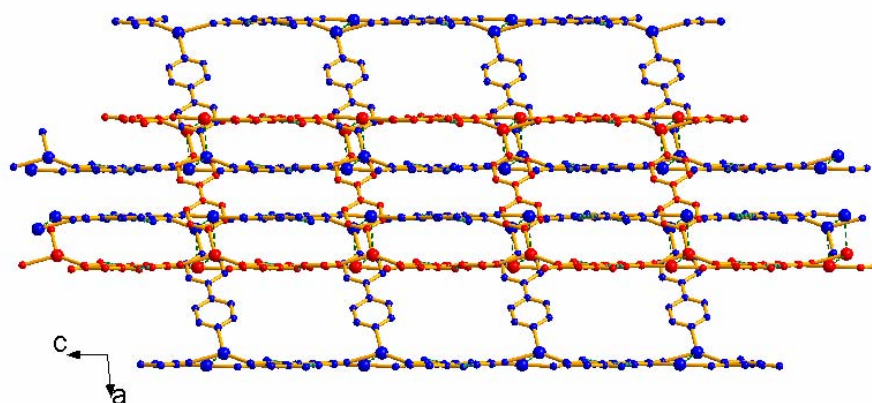

**Figure S4.** View of the packing structure of 1.
